# Supplementary material
Source: PubMed Central journal article supplement (PMC10580306)
Supplement: NIHPP2023.09.12.557433v2-supplement-1.pdf [file NIHPP2023.09.12.557433v2-supplement-1.pdf]

**Figure S1**

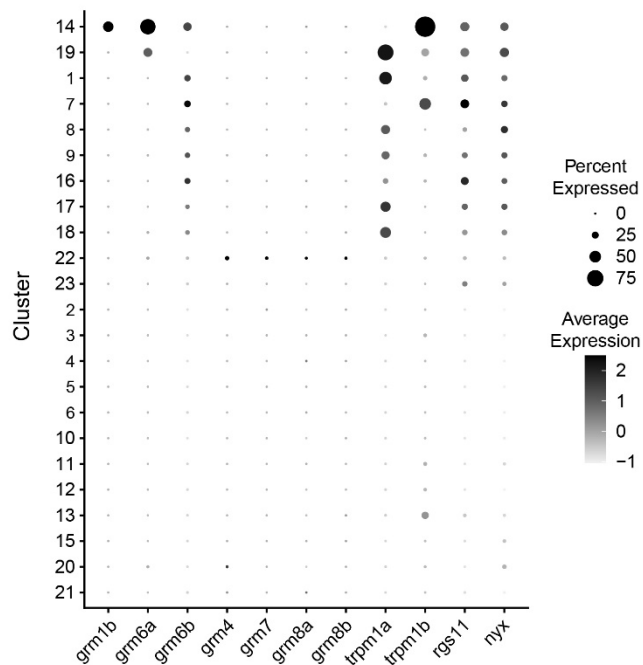

**Figure S1. Expression patterns of the identified marker genes in BC clusters**

The size of each circle depicts the percentage of cells in the cluster in which the marker was detected ( $\geq 1$  UMI), and its grey scale depicts the scaled average expression level of cells within the cluster

## Figure S2

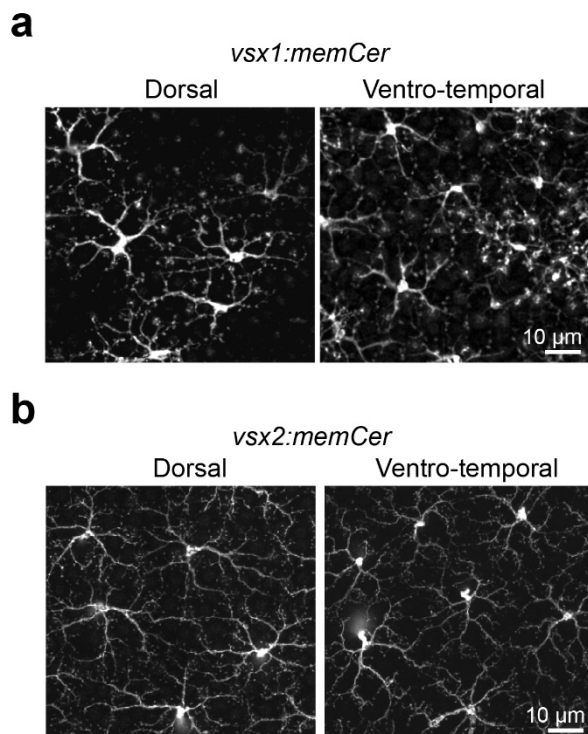

### **Figure S2. Dendritic tiling of RBC1 and RBC2 BCs across the retina**

*Confocal images of retinal flat mount at outer plexiform layer level from  $Tg(vsx1:memCerulean)^{q19}$  (*vsx1:memCer*) and  $Tg(vsx2:memCerulean)^{wst01}$  (*vsx2:memCer*).*

*Note that the *vsx1:memCer* line occasionally labels OFF BCs. These BCs were distinguished by tracing the cells to the axon terminals in the confocal image volumes.*

**Figure S3**

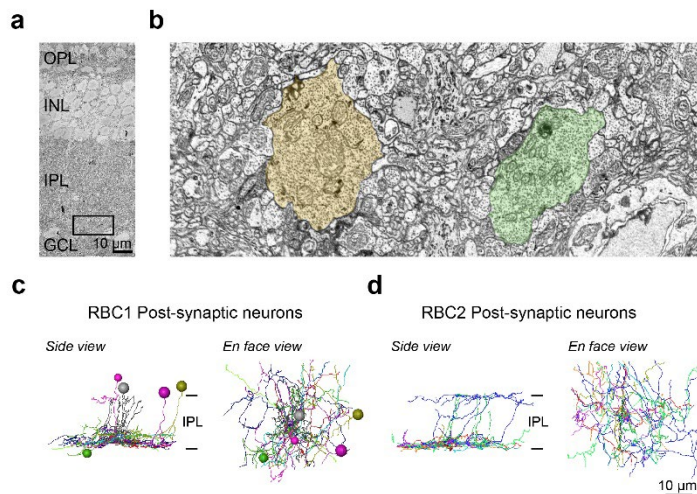

**Figure S3. Identification of RBC1 and RBC2 postsynaptic neurons in SBFSEM volume**

*a*, A partial image of an example SEM image of an adult zebrafish retina. OPL (outer plexiform layer), INL (inner nuclear layer), IPL (inner plexiform layer), GCL (ganglion cell

319 *layer). **b**, Magnified image of the region within the black box in **a** at the bottom layer of the IPL.*  
320 *Characteristic large bipolar cell axons are painted in light yellow and green. **c,d**, Traces of*  
321 *neuronal processes and the location of somas of cells that are post-synaptic to RBC1 and RBC2*  
322 *cells. Individual cells were color coded. IPL: inner plexiform layer.*

**Figure S4**

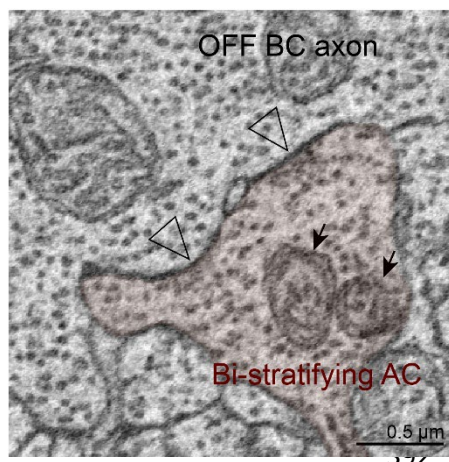

**Figure S4. Ultrastructure of the zebrafish A2 AC boutons in the OFF layer**

Examples of large synaptic sites (arrowheads) between bi-stratifying A2-like AC and OFF BC axon terminals in the OFF layer. The A2 AC boutons often contain mitochondria (arrows).

## Figure S5

### Monostratifying-AC with reciprocal synapses (A17-like)

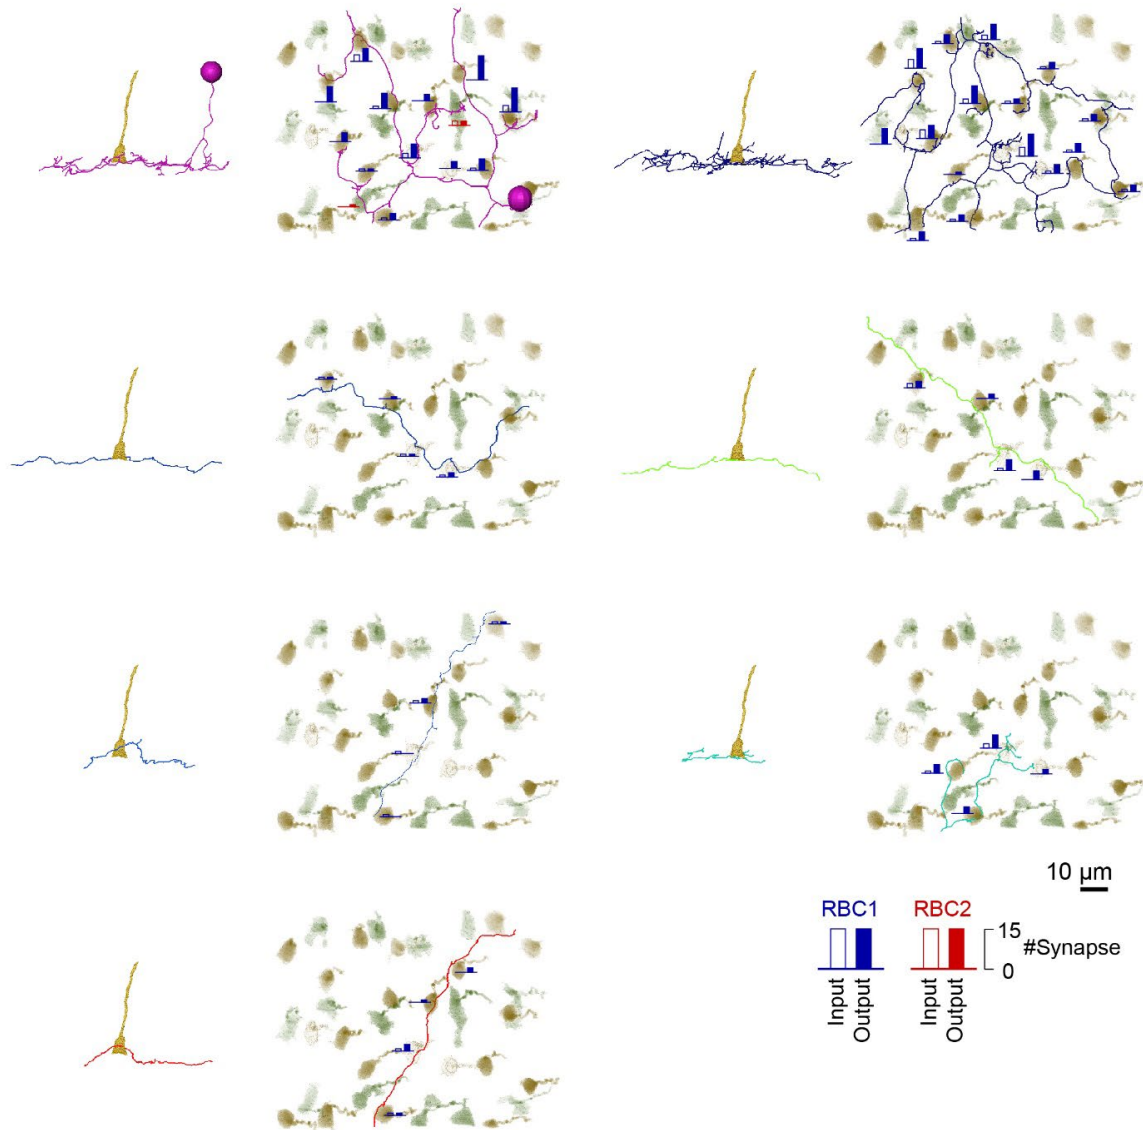

752

753 **Figure S5. Gallery of mono-stratifying AC making reciprocal synapses with RBC1**

754 *En face* and side views of individual cells or processes. The numbers of input (open bar) and  
755 output (closed bar) synapses with each RBC1 (blue) and RBC2 (red) terminal are indicated as  
756 the height of the bars.

## Figure S6

### Monostratifying-AC without reciprocal synapses

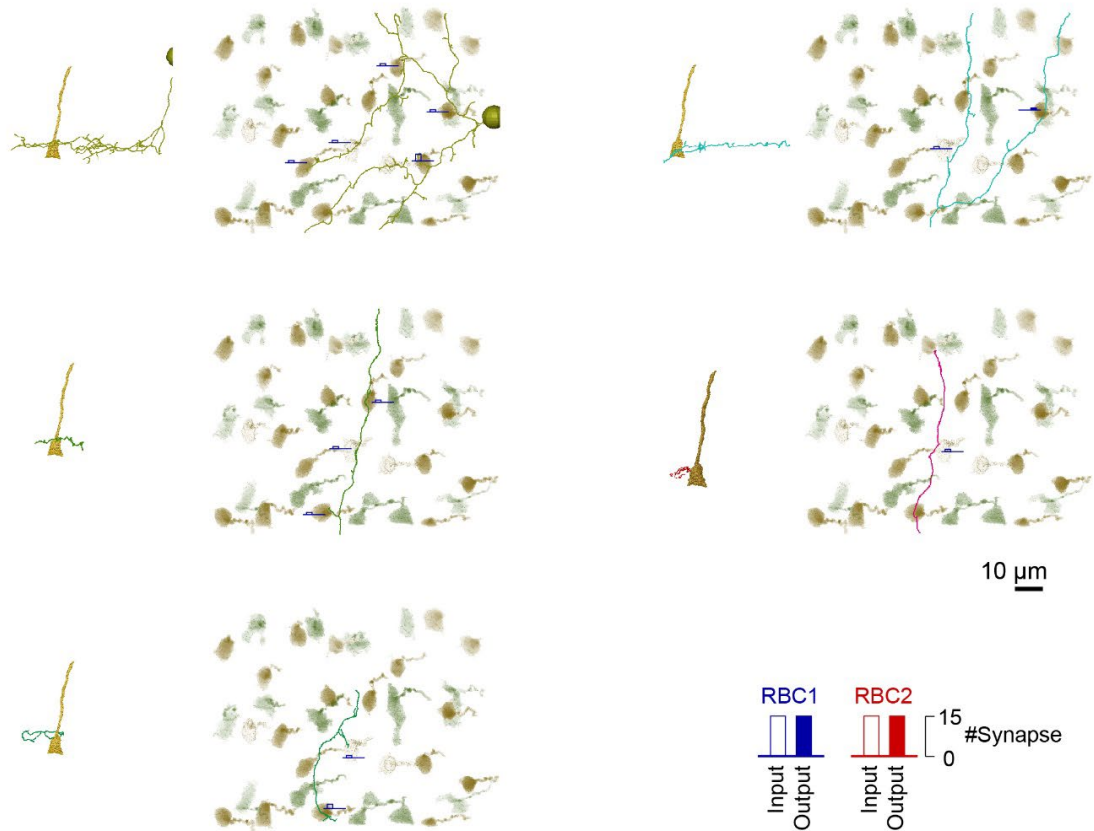

757

758 **Figure S6. Gallery of mono-stratifying AC without reciprocal synapses with RBC1**

759 *En face* and side views of individual cells. The numbers of input (open bar) and output (closed  
760 bar) synapses with each RBC1 (blue) and RBC2 (red) terminal are indicated as the height of the  
761 bars.

762

763

764

## Figure S7

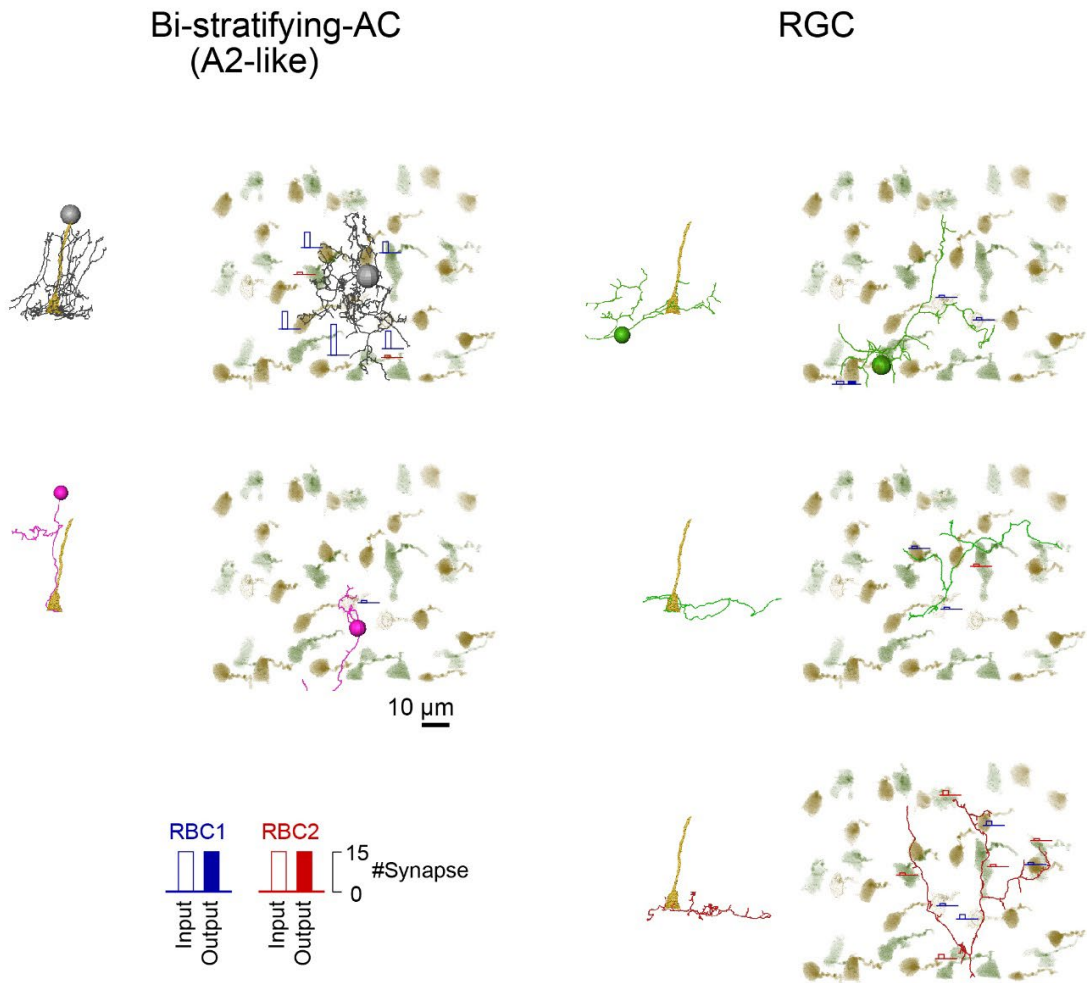

765

766 **Figure S7. Gallery of bi-stratifying AC and RGC contacted to RBC1**

767 *En face* and side views of individual cells. The numbers of input (open bar) and output (closed  
768 bar) synapses with each RBC1 (blue) and RBC2 (red) terminal are indicated as the height of the  
769 bars.

770

771

772



## Figure S8

### Monostratifying-AC with reciprocal synapses

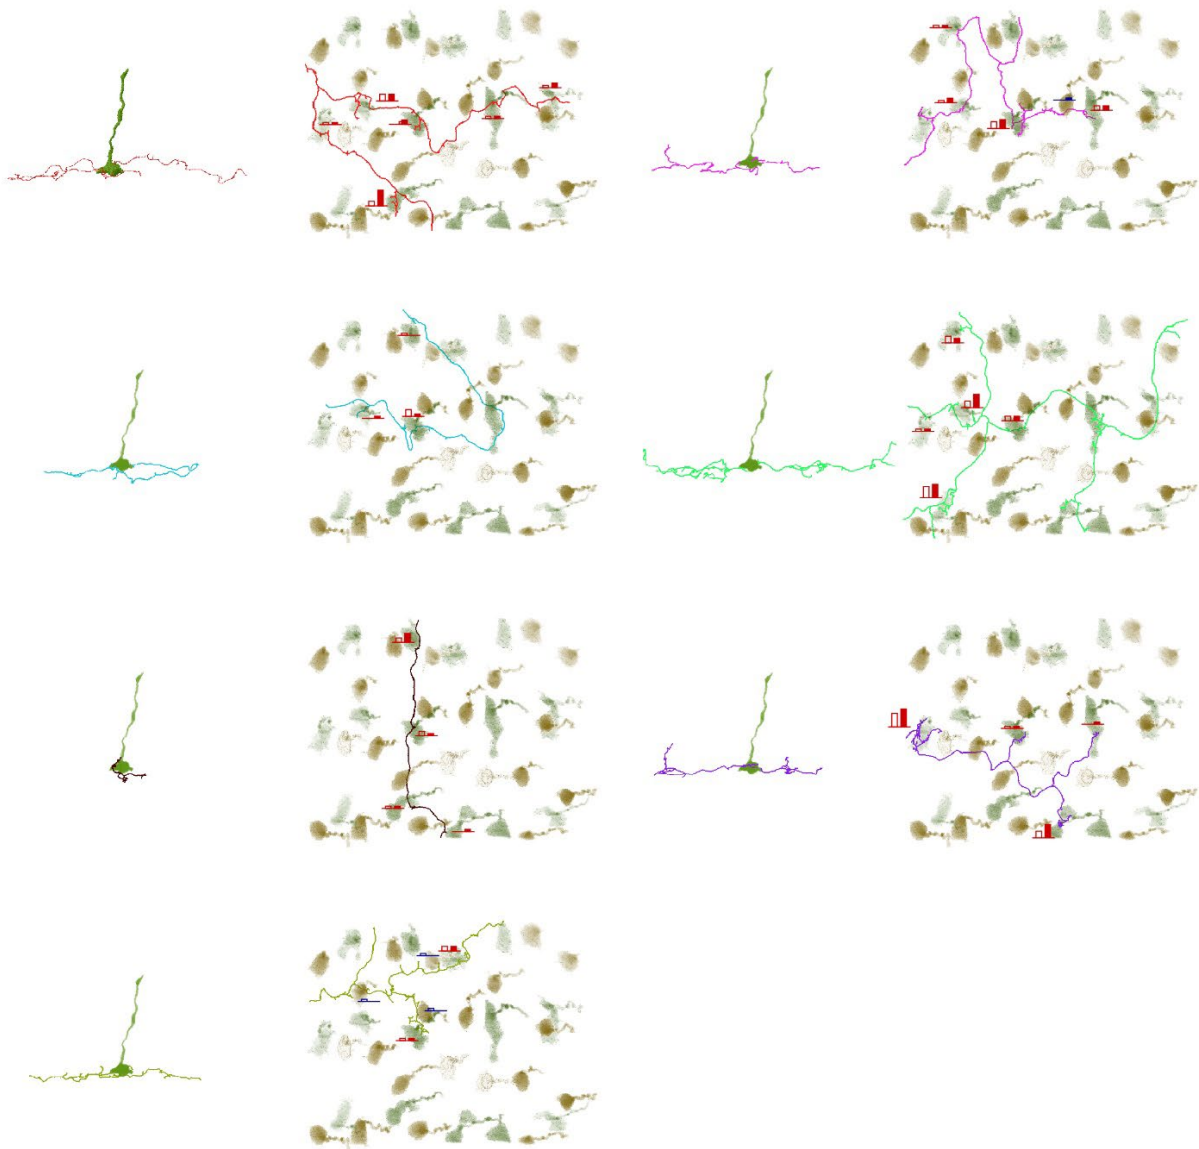

### Monostratifying-AC without reciprocal synapses

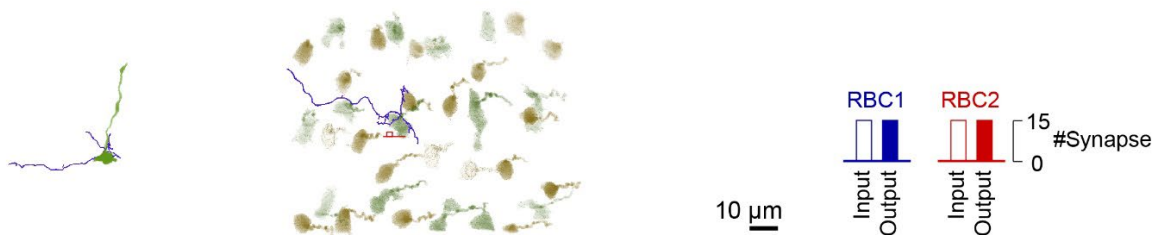

774 **Figure S8. Gallery of mono-stratifying AC connected to RBC2**

775 *En face* and side views of individual cells. The numbers of input (open bar) and output (closed  
776 bar) synapses with each RBC1 (blue) and RBC2 (red) terminal are indicated as the height of the  
777 bars.

778

## Figure S9

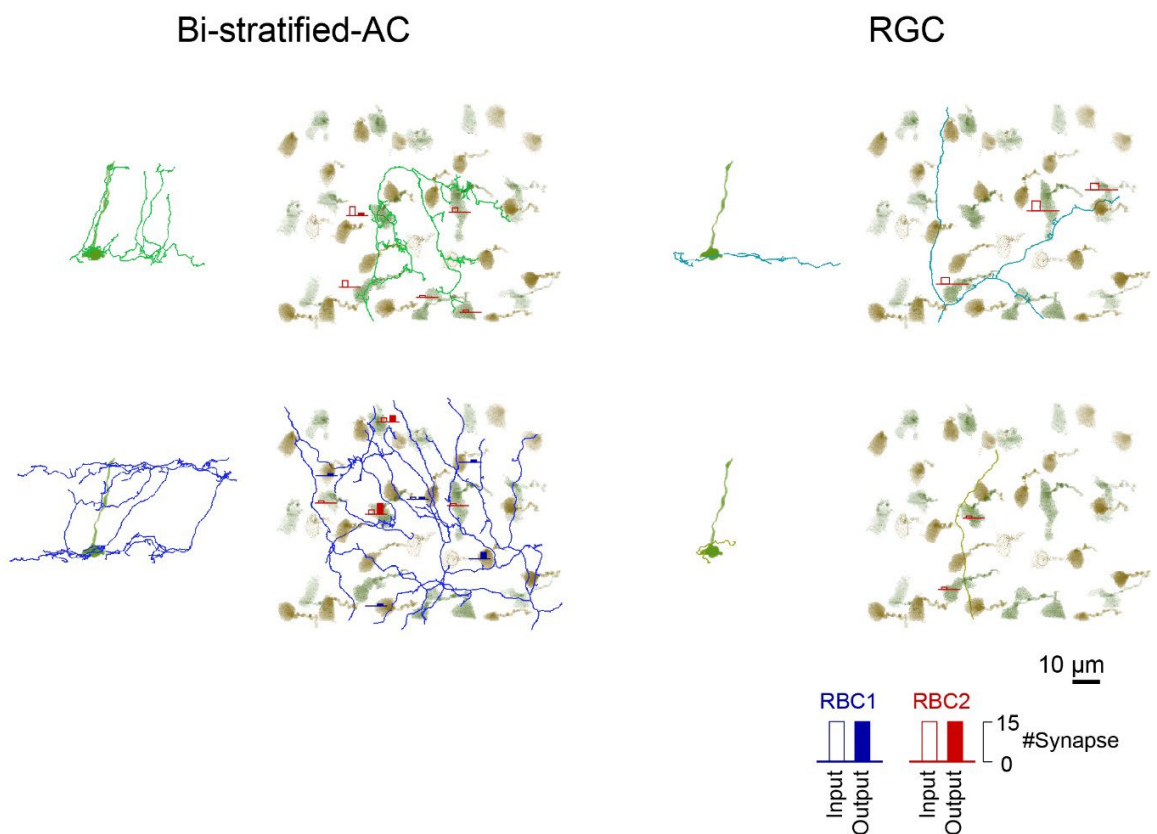

779

780 **Figure S9. Gallery of bi-stratifying AC and RGC connected to RBC2**

781 *En face* and side views of individual cells. The numbers of input (open bar) and output (closed  
782 bar) synapses with each RBC1 (blue) and RBC2 (red) terminal are indicated as the height of the  
783 bars.
